# Supplementary material for: Fabrication of fluorescent nitrogen-rich graphene quantum dots by tin(iv) catalytic carbonization of ethanolamine
Source: Royal Society of Chemistry journal article supplement (doi:10.1039/c5ra08336b), 2015-01-01

Electronic Supplementary Material (ESI) for RSC Advances.  
This journal is © The Royal Society of Chemistry 2015

## Fabrication of Fluorescent Nitrogen-Rich Graphene Quantum Dots by Tin(IV) Catalytic Carbonization of Ethanolamine

Wei Zhu <sup>a</sup>, Hongjie Song <sup>a</sup>, Lichun Zhang <sup>a\*</sup>, Yueyang Weng <sup>a</sup>, Yingying Su <sup>b</sup> and Yi Lv <sup>a\*</sup>

<sup>a</sup> Key laboratory of Green Chemistry & Technology, Ministry of Education, College of Chemistry, Sichuan University, Chengdu, Sichuan, 610064, China; Web: . E-mail: lvy@scu.edu.cn; Fax: +86 28 85412798; Tel: +86 28 85412798

<sup>b</sup> Analytical & Testing Center, Sichuan University, Chengdu, Sichuan, 610064, China.

### CONTENTS

#### 1. Experimental Section.

2. Table S1. QY of the as-prepared N-rich GQDs.

3. Figure S1. The solubility of N-rich GQDs in various solvents.

4. Figure S2. XRD of N-rich GQDs.

5. Figure S3. AFM of N-rich GQDs.

6. Figure S4. Raman spectra of N-rich GQDs.

7. Figure S5. FTIR of N-rich GQDs.

8. Figure S6. Investigate the factors influencing N-rich GQDs formation.

9. Figure S7. SEM, EDS, XRD of SnO<sub>2</sub>.

10. Figure S8. XPS full scan spectrum of N-rich GQDs@2h (a) and N-rich GQDs@6h (b).

11. Figure S9. FL and UV-Vis spectra of N-rich GQDs at different stages.

12. Figure S10. N-rich GQDs prepared in different condition.

13. Figure S11. UV-Vis spectra of N-rich GQDs, folic acid and N-rich GQDs & folic acid.

14. Table S2. Element analysis of N-rich GQDs at different stage.

15. Table S3. The relative contents of O atoms in different chemical environment of the N-rich GQDs at different reaction time analyzed by XPS.

16. Table S4. Fluorescence lifetimes of N-rich GQDs in the presence and absence of folic acid.

17. Figure S12. Selectivity of FL probe based on the nitrogen-rich graphene quantum dots.

## Experimental Section

**Reagents and Materials.** High-purity 18.2 M $\Omega$ -1cm deionized water (DIW) was obtained from a water purification system (Chengdu ULTRAPURE Technology Co. Ltd., Chengdu, China). SnCl<sub>4</sub>.5H<sub>2</sub>O and ethanol were purchased from Kelong Chemical Reagent Company (Chengdu, China). Ethanolamine was obtained from Chengdu United Institute of Chemical & Reagent. Folic acid was purchased from Aladdin Chemistry Co. Ltd. A phosphate buffer solution (PBS) of 0.01M was prepared by dissolving Na<sub>3</sub>PO<sub>4</sub> and NaH<sub>2</sub>PO<sub>4</sub>.2H<sub>2</sub>O respectively and adjusted to the required pH value with each other. All chemicals were at least of analytical grade.

### Quantum yield determination of N-rich GQDs.

The quantum yield of the synthesized N-rich GQDs was determined by point method<sup>[1]</sup> by the reference of quinine sulfate (0.1M H<sub>2</sub>SO<sub>4</sub> as solvent; QY=0.577). The value of quantum yield in water was calculated using the equation below.

$$Q_x = Q_{st} (I_x / I_{st}) (A_{st} / A_x) (\eta_x^2 / \eta_{st}^2)$$

Where Q is the quantum yield (QY). I is the measured integrated fluorescence emission intensity peaked 425 nm. A represents the UV-Vis absorbance at the excitation wavelength. In order to minimize reabsorption effects, absorption intensity was controlled under 0.05 and made sure that the refractive index of the solvent remained constant. The subscript "x" refers to the sample and "st" for standard with known QY, respectively. The QYs were equal to the average of three tests.

**Table S1.** QY of the as-prepared N-rich GQDs.

| Sample (1)      | Integrated emission Intensity (I) | Abs at 350 nm Wavelength (A) | Refractive index of solvent(n) | Quantum Yield (%) |
|-----------------|-----------------------------------|------------------------------|--------------------------------|-------------------|
| Quinine sulfate | 4584                              | 0.033                        | 1.33                           | 57.7              |
| N-rich GQDs@2h  | 468.1                             | 0.018                        | 1.33                           | 10.80             |
| N-rich GQDs@8h  | 650.3                             | 0.023                        | 1.33                           | 11.74             |
| N-rich GQDs@15h | 878.5                             | 0.024                        | 1.33                           | 15.20             |

| Sample (2) | Integrated emission Intensity (I) | Abs at 350 nm Wavelength (A) | Refractive index of solvent(n) | Quantum Yield (%) |
|------------|-----------------------------------|------------------------------|--------------------------------|-------------------|
|------------|-----------------------------------|------------------------------|--------------------------------|-------------------|

|                 |       |       |      |       |
|-----------------|-------|-------|------|-------|
| Quinine sulfate | 4340  | 0.030 | 1.33 | 57.7  |
| N-rich GQDs@2h  | 550.6 | 0.022 | 1.33 | 9.98  |
| N-rich GQDs@8h  | 647.4 | 0.021 | 1.33 | 12.30 |
| N-rich GQDs@15h | 756.1 | 0.019 | 1.33 | 15.87 |

| Sample (3)      | Integrated emission Intensity (I) | Abs at 350 nm Wavelength (A) | Refractive index of solvent(n) | Quantum Yield (%) |
|-----------------|-----------------------------------|------------------------------|--------------------------------|-------------------|
| Quinine sulfate | 3426                              | 24                           | 1.33                           | 57.7              |
| N-rich GQDs@2h  | 682.4                             | 0.025                        | 1.33                           | 11.03             |
| N-rich GQDs@8h  | 409.9                             | 0.012                        | 1.33                           | 13.81             |
| N-rich GQDs@15h | 775.2                             | 0.020                        | 1.33                           | 15.67             |

□

**Figure S1.** The solubility of N-rich GQDs in various solvents.

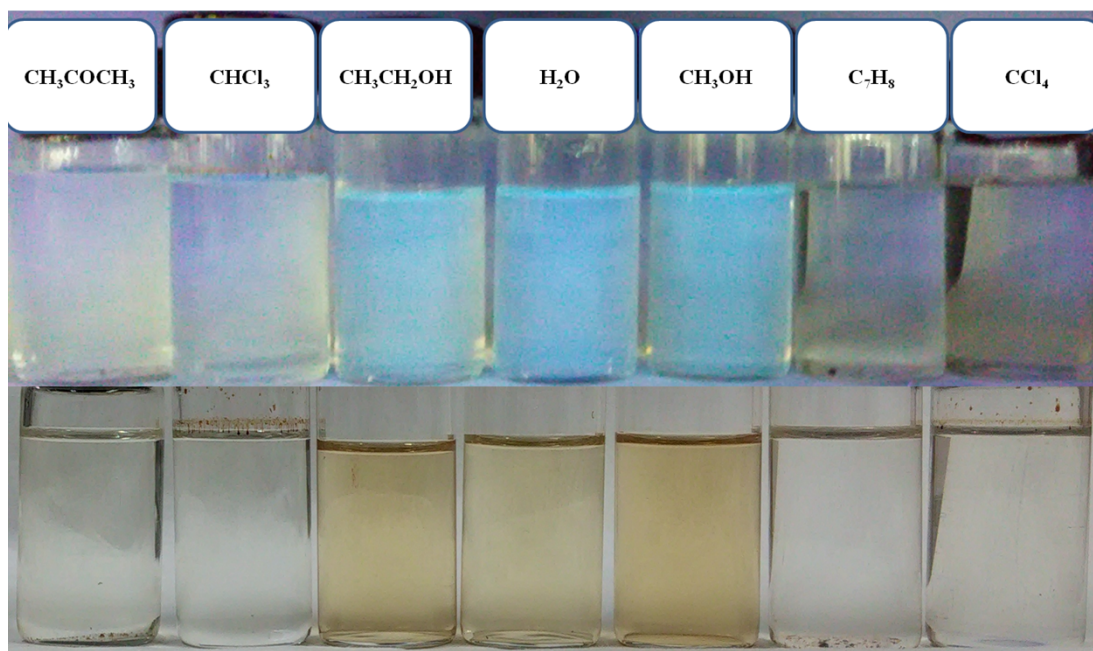

Figure S2. XRD of N-rich GQDs.

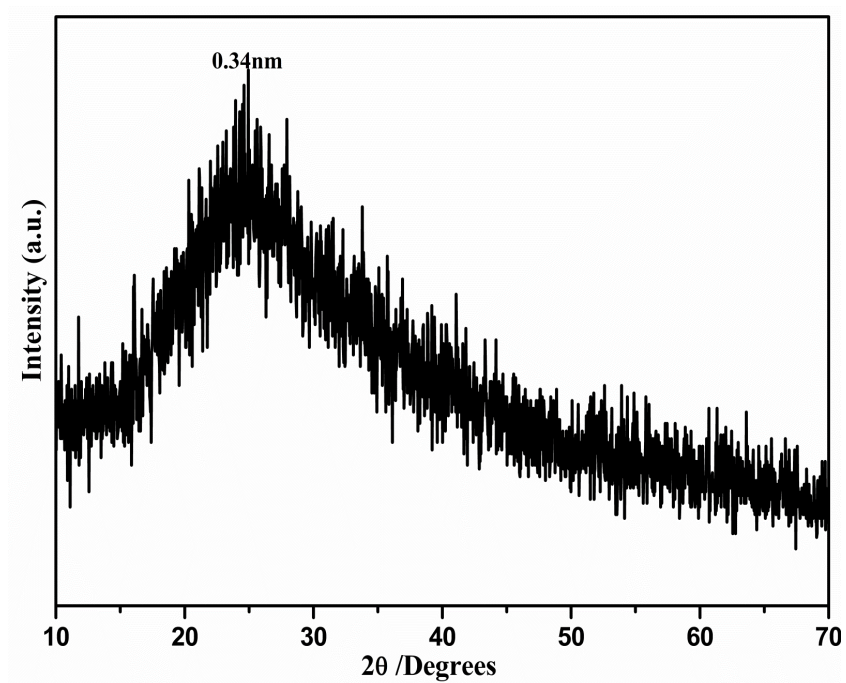

Figure S3. AFM of N-rich GQDs.

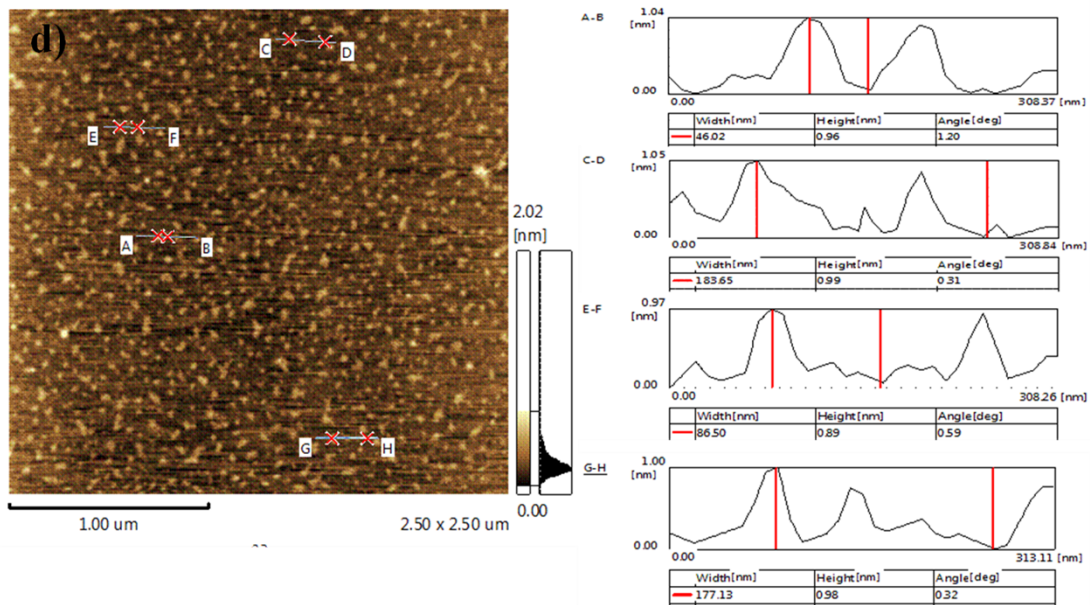

Figure S4. Raman spectra of N-rich GQDs.

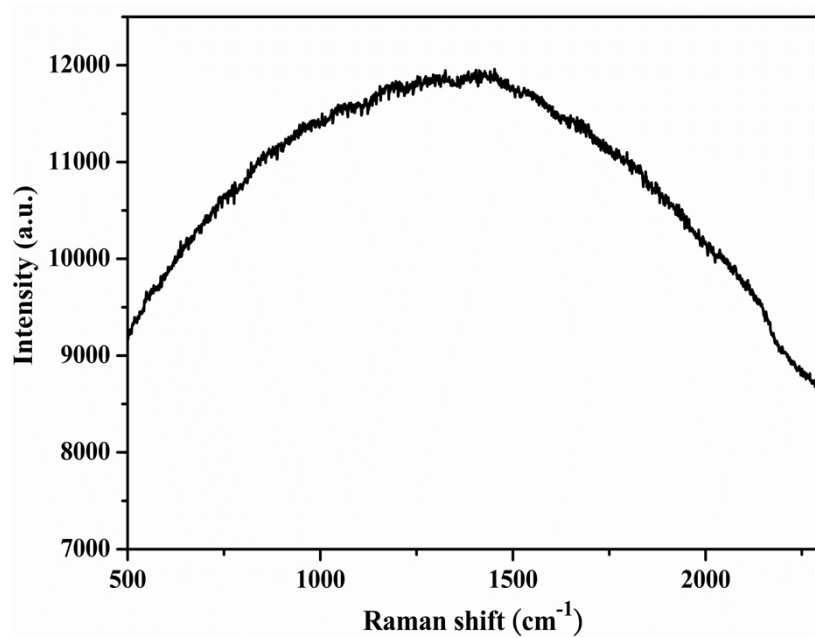

Figure S5. FTIR of N-rich GQDs.

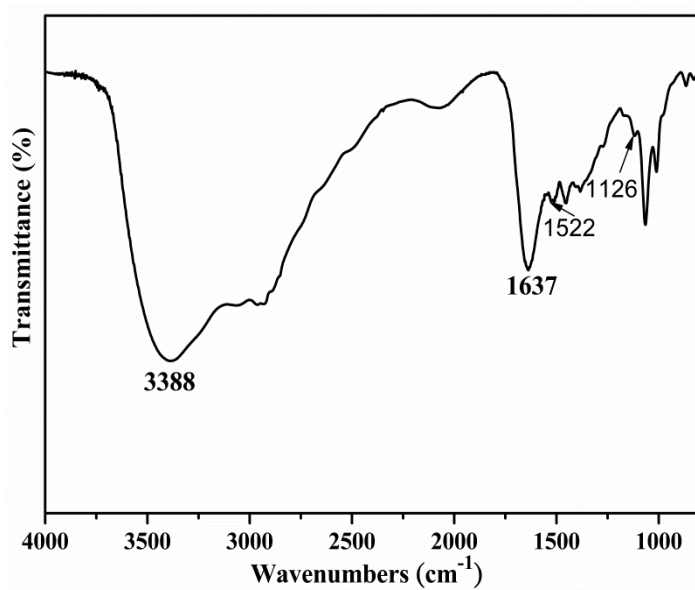

**Figure S6.** Investigate the factors influencing N-rich GQDs formation. The ratio of  $\text{SnCl}_4 \cdot 5\text{H}_2\text{O}$  and  $\text{HO}(\text{CH}_2)_2\text{NH}_2$  ( a ), reaction time ( b ) and catalytic efficiency of  $\text{SnCl}_4 \cdot 5\text{H}_2\text{O}$  at  $100^\circ\text{C}$  ( c ) .

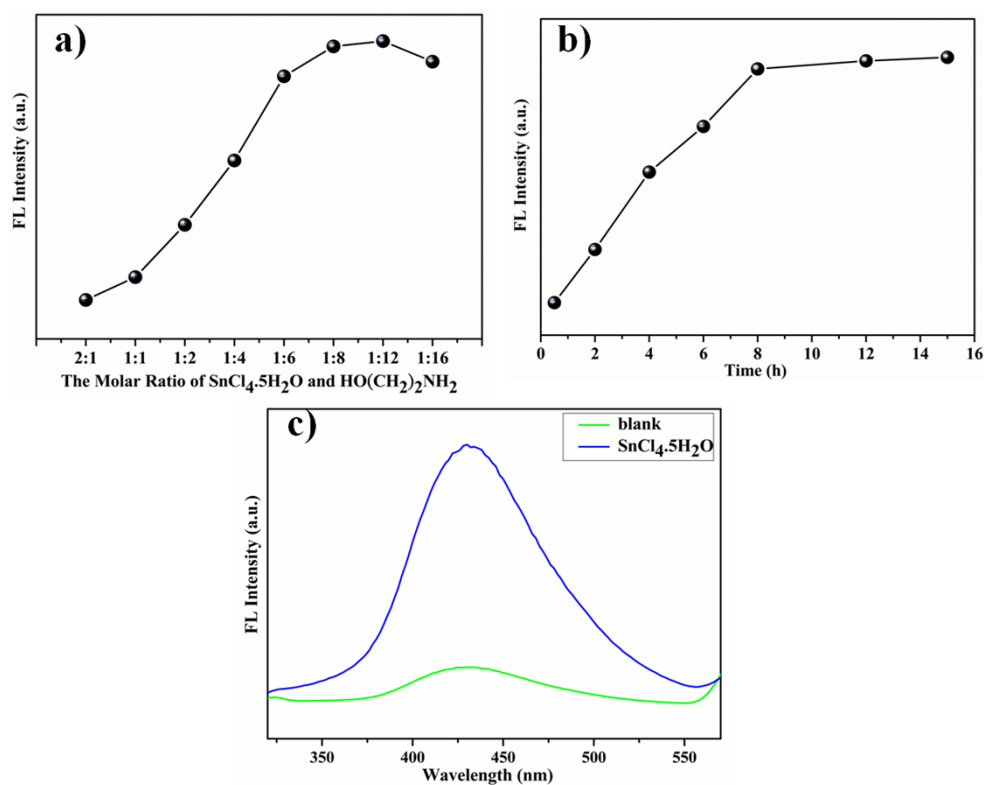

**Figure S7.** SEM (a), EDS (b), XRD (c) of  $\text{SnO}_2$ .

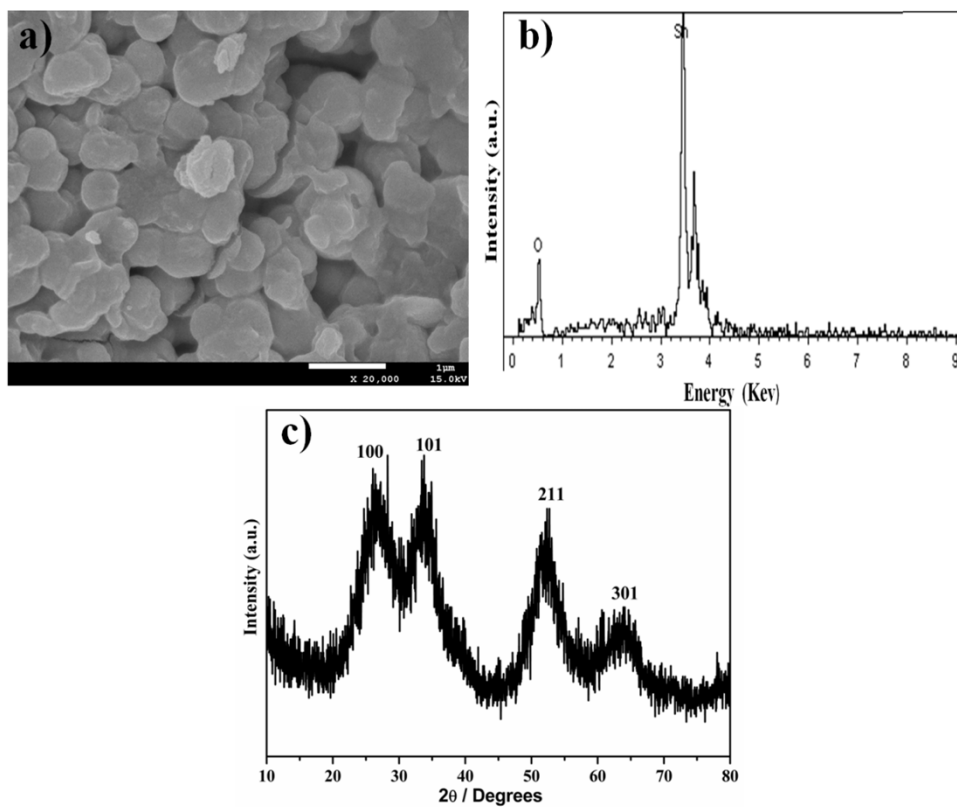

Figure S8. XPS full scan spectrum of N-rich GQDs@2h (a) and N-rich GQDs@6h (b).

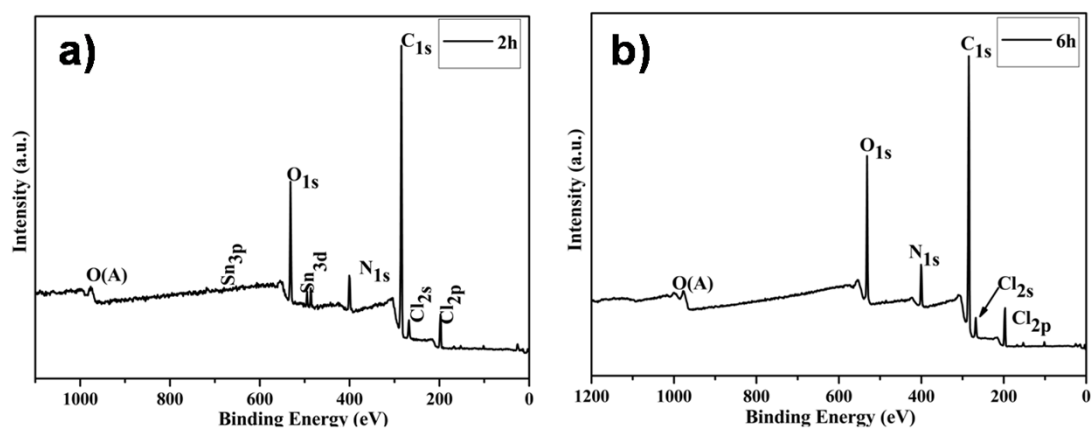

**Figure S9.** FL (a) and UV-Vis (b) spectra of N-rich QDs at different stages.

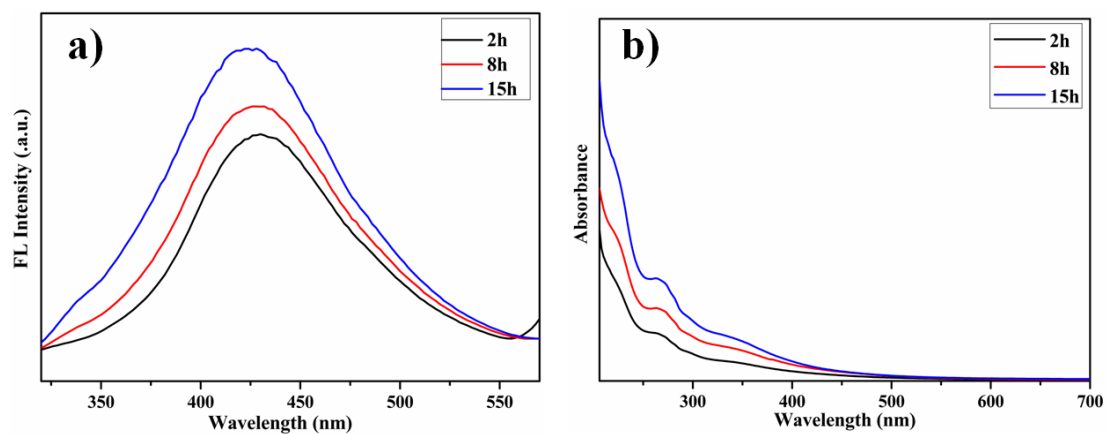

**Figure S10.** N-rich QDs prepared in different condition

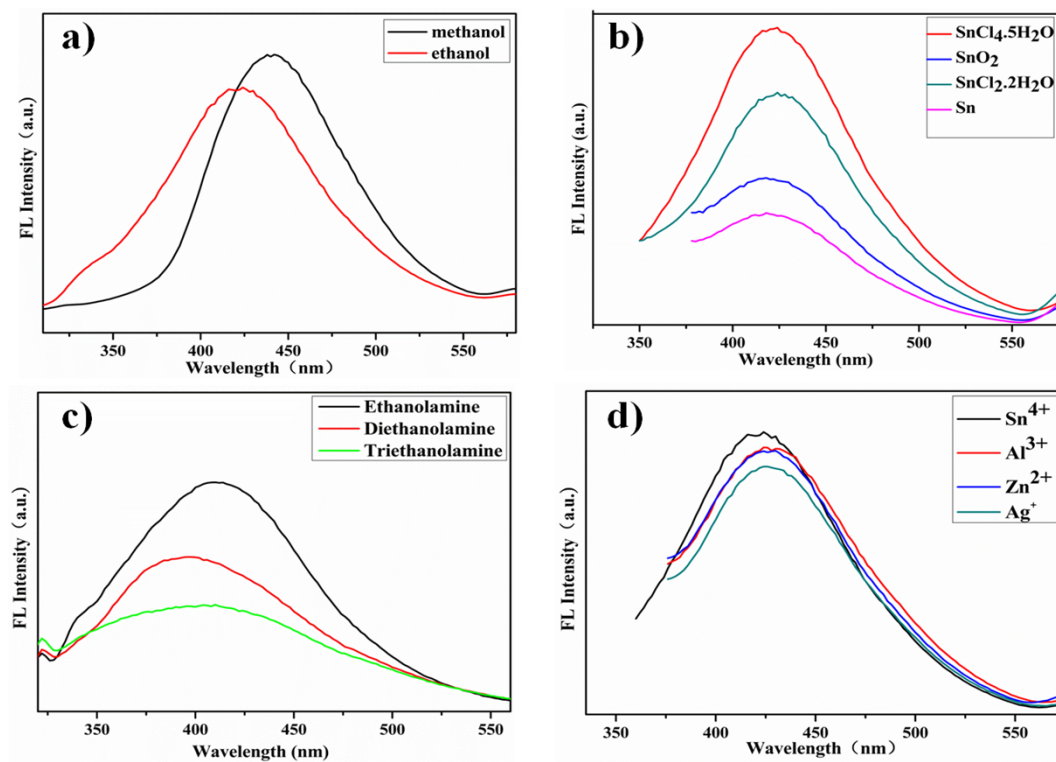



**Figure S11.** UV-Vis spectra of N-rich GQDs, folic acid and N-rich GQDs & folic acid.

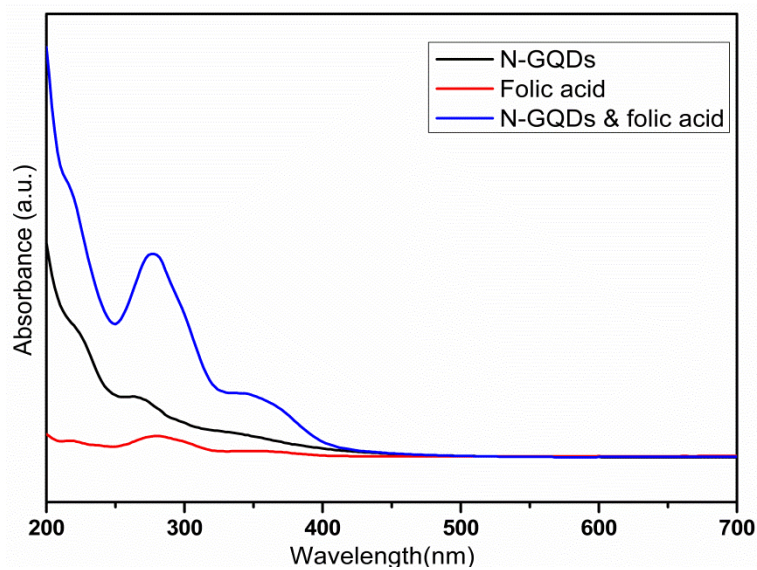

**Table S2.** Element analysis of N-rich GQDs at different stage.

| Sample     | C(wt%) | H(wt%) | N(wt%) |
|------------|--------|--------|--------|
| N-GQDs@2h  | 64.65  | 12.95  | 22.4   |
| N-GQDs@8h  | 64.44  | 13.64  | 21.92  |
| N-GQDs@15h | 67.29  | 13.92  | 18.79  |

**Table S3.** The relative contents of O atoms in different chemical environment of the N-rich GQDs at different reaction time analyzed by XPS.

| Binding energy<br>(eV) | Integrated Area |                |                 |
|------------------------|-----------------|----------------|-----------------|
|                        | N-rich GQDs@2h  | N-rich GQDs@8h | N-rich GQDs@15h |
| C=O                    | 45120.52        | 29405.00       | 28309.52        |
| C-O                    | 3424.86         | 14149.40       | 16208.98        |

**Table S4.** Fluorescence lifetimes of N-rich GQDs in the presence and absence of folic acid. The lifetimes were obtained by three-exponential fitting and  $\langle\tau\rangle$  stands for the average lifetime calculated using formula 1 ( $t$  is the time,  $\tau$  is the lifetime, and  $A$  is the pre-exponential factor)

| Sample                 | $\tau_1/\text{ns}(A_1\%)$ | $\tau_2/\text{ns}(A_2\%)$ | $\tau_3/\text{ns}(A_3\%)$ | $\langle\tau\rangle/\text{ns}$ |
|------------------------|---------------------------|---------------------------|---------------------------|--------------------------------|
| N-rich GQDs            | 1.08(9.67)                | 5.45(40.90)               | 13.53(49.43)              | 11.38                          |
| N-rich GQDs@Folic Acid | 0.97(8.80)                | 5.28(42.59)               | 13.24(48.61)              | 11.08                          |

$$\langle\tau\rangle = (A_1\tau_1^2 + A_2\tau_2^2 + A_3\tau_3^2) / (A_1\tau_1 + A_2\tau_2 + A_3\tau_3)$$

[1] L. L. Li, G. H. Wu, T. Hong, Z. Y. Yin, D. Sun, E. S. A-H, J-J Zhu, *ACS Appl. Mater. Interfaces* **2014**, *6*, 2858–2864.

**Figure S12.** Selectivity of FL probe based on the nitrogen-rich graphene quantum dots (the concentration of folic acid: 20  $\mu\text{M}$ ; the concentration of others: 200  $\mu\text{M}$ ).

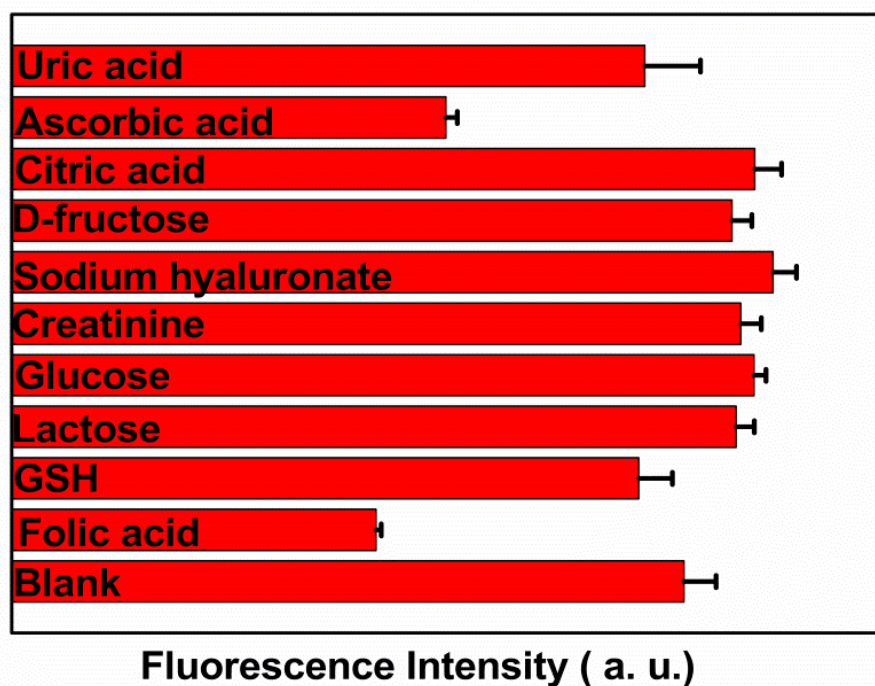

Supplement: c5ra08336b1.pdf [file c5ra08336b1.pdf]
